# Supplementary material for: Refined multivalent display of bacterial spore-binding peptides
Source: Royal Society of Chemistry journal article supplement (doi:10.1039/b820013k), 2009-01-01
Supplement: b820013k.pdf [file b820013k.pdf]

## Supplementary Figures

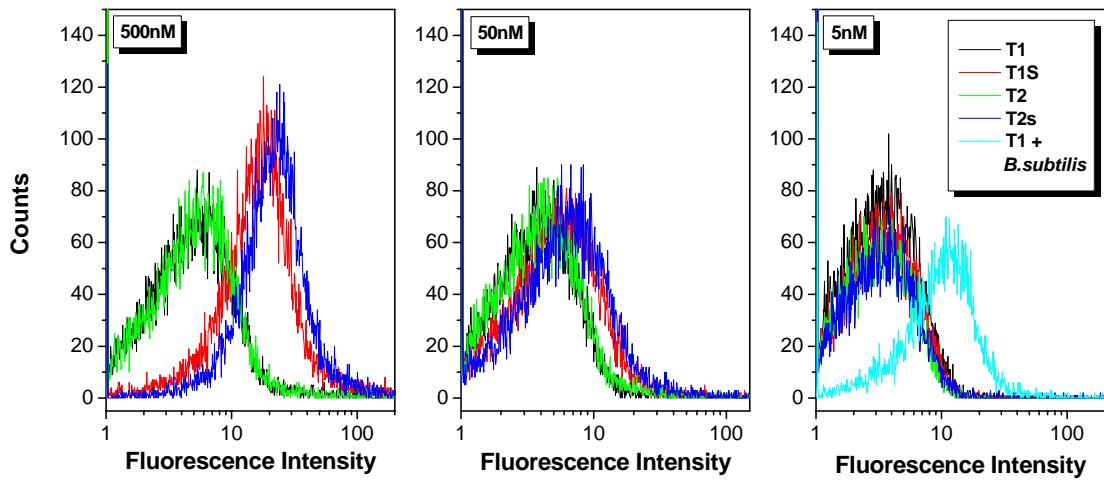

**Figure S1.** Binding of the different tetraivalent peptides to *B. licheniformis* spores at different concentrations of peptides.

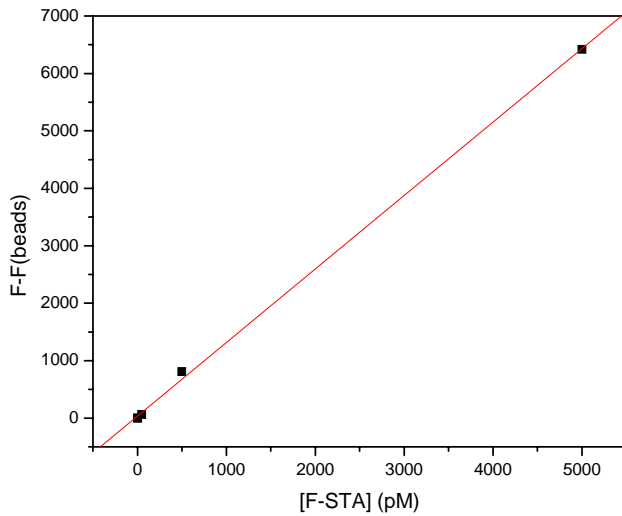

**Figure S2.** Calibration curve for the determination of the concentration of binding sites for spore.
